# Supplementary material
Source: PubMed Central journal article supplement (PMC7205494)
Supplement: AEM.02687-19-s0001.pdf [file AEM.02687-19-s0001.pdf]

**Supplementary Information for**

**Functional characterization of Vib-PT, an aromatic prenyltransferase involved in the biosynthesis of vibrinalactone from *Stereum vibrans***

Na Bai<sup>1,3</sup>, Guo-Hong Li<sup>1,3</sup>, Shao-Liu Luo<sup>1</sup>, Liangcheng Du<sup>2</sup>, Qian-Yi Hu<sup>1</sup>, Han-Ke Xu<sup>1</sup>, Ke-Qin Zhang<sup>1,\*</sup>, Pei-Ji Zhao<sup>1,\*</sup>

<sup>1</sup>State Key Laboratory for Conservation and Utilization of Bio-Resources in Yunnan, and Key Laboratory for Microbial Resources of the Ministry of Education, Yunnan University, Kunming 650091, PR China

<sup>2</sup>Department of Chemistry, University of Nebraska Lincoln, Lincoln, Nebraska 68588, USA

<sup>3</sup>These authors contributed equally to this work

\*Correspondence:

Ke-Qin Zhang: E-mail: kqzhang1@ynu.edu.cn, Tel: 86-871-65034878

Pei-Ji Zhao: E-mail: pjzhao@ynu.edu.cn, Tel: 86-871-65031092

Na Bai and Guo-Hong Li contributed equally to this work. Author order was determined both alphabetically and in order of increasing seniority.

**Table S1. Primer sequences used for PCR and qPCR**

| Name                | Primer sequence (5'-3')                  |
|---------------------|------------------------------------------|
| Alc_A-F             | CCAAGCTTTGAAAAGCTGATTGTGAT               |
| Alc_A-R             | CGGGATCCGCTAATTAAGTACTGAGTAGA            |
| PT-2UP-BamH1        | ATGGATCCCGCTTCTCGGTCACTGTTATGGTC         |
| PT-2DN-HpaI         | ATGTTAAC TTGCGAACTCGTAGTGGTAAGGTA        |
| PT-2iv-UP-sac1      | AT GAGCTCTTGCGAACTCGTAGTGGTAAGGTA        |
| PT-2iv-DN-xho1-Not1 | ATCTCGAGGCGGCCGCGCTTCTCGGTCACTGTTAT GGTC |
| PT-FW F             | CCACCATGGTAGATCTTTGCGAACTCGTAGTGGTAAGG   |
| PT-FW R             | AACACTAGTCAGATCTTTTAAAAGCTGATTGTGATAGTTC |
| PT-IV F             | ATCCTCTAGAGTCGACCGCTTCTCGGTCACTGTT       |
| PT-IV R             | ATGCCTGCAGGTCGACAACAAGAGAGGTCCACAATGA    |
| IN F                | AATTCTGATGTGTAATTCTG                     |
| ALC R               | GTAAACACTAGTCAGATCTTT                    |
| 1HF                 | ATTCGGCTCCAACAATGTC                      |
| 1IR                 | GTCCACAATGATAAAGAGGG                     |
| $\beta$ -tubulin F  | ATGCGTGAGATTGTCCATCT                     |
| $\beta$ -tubulin R  | CCATGGTTCCGGGCTCGAGA                     |
| PT F                | CTATCCCTCCTTGGTCAACT                     |
| PT R                | TTAGGAAGCTGCCTCTCTGC                     |

**Table S2. Strains and plasmids**

| Strain or Vector                         | Properties                                                                                                                                         | Reference or Source    |
|------------------------------------------|----------------------------------------------------------------------------------------------------------------------------------------------------|------------------------|
| <i>E. coli</i> BL21(DE3)                 | F <sup>-</sup> , ompT, hsdS(rBB-mB-), gal, dcm (DE3)                                                                                               | Novagen                |
| <i>Agrobacterium tumefaciens</i> AGL1    | Genotype C58 RecA (rif R/carbR) Ti pTiBo542DT-DNA (strepR) Succinamopine.                                                                          | Biomed                 |
| <i>Agrobacterium tumefaciens</i> LBA4404 | Genotype Ach5 (RIF R) Ti pAL4404 (strepR) Octopine.                                                                                                | Biomed                 |
| <i>Agrobacterium tumefaciens</i> EHA105  | Genotype C58 (rif R) Ti pEHA105 (pTiBo542DT-DNA) Succinamopine.                                                                                    | Biomed                 |
| <i>Agrobacterium tumefaciens</i> GV3101  | Genotype C58 (rif R) Ti pMP90 (pTiC58DT-DNA) ( gentR) Nopaline.                                                                                    | Biomed                 |
| <i>Stereum vibrans</i>                   | Wild-type, vibrallactone producer                                                                                                                  | Zhao et al., 2013      |
| <i>Stereum vibrans</i> A2                | <i>vib-PT</i> RNA silencing transformant by targeted PCR                                                                                           | This study             |
| <i>Stereum vibrans</i> G7                | <i>vib-PT</i> RNA silencing transformant by targeted PCR                                                                                           | This study             |
| pUC18                                    | pUC cloning vector                                                                                                                                 | Addgene                |
| pC-HYG-YR                                | Yeast recombinational cloning compatible <i>Agrobacterium tumefaciens</i> ternary vector containing a hygromycin selectable marker on transfer DNA | Addgene                |
| pUCH2-8                                  | pUCH2-8 containing the hygromycin B phosphotransferase gene, as the selectable marker for transformation of <i>Aspergillus</i>                     | Alexander et al., 1998 |
| pMCB17apx                                | Promoter of alcohol dehydrogenase <i>alcA</i> (p)                                                                                                  | Efimov, 2003           |
| pUC18-RNAi                               | pUC18 harboring the second intron of the <i>Arabidopsis</i> small nuclear ribonuclear protein D1 (locus At 4g02840)                                | Kumar et al., 2012     |
| pUNZ101                                  | The promoter of <i>alcA</i> (p) was cloned into the expression vector pUCH2-8                                                                      | This study             |
| pUNZ103                                  | A 1103-bp and reverse-complement of <i>vib-PT</i> cloned into the two ends of the intron of the pUC18-RNAi vector                                  | This study             |
| pUNZ104                                  | The 2456-bp RNA silencing cassette digested with BamHI and NotI and cloned into pUNZ101                                                            | This study             |
| pYUZ10                                   | A 1479-bp element containing the <i>alcA</i> promoter and <i>vib-PT</i> forward sequence subcloned into the pC-HYG-YR vector                       | This study             |
| pYUZ11                                   | A 1357-bp element containing the intron and <i>Vib-PT</i> reverse-complemented sequence cloned into pYUZ10                                         | This study             |

## References

- Alexander NJ, Hohn TM, McCormick SP. 1998. The TRI11 gene of *Fusarium sporotrichioides* encodes a cytochrome P-450 monooxygenase required for C-15 hydroxylation in trichothecene biosynthesis. *Appl Environ Microbiol* 64(1): 221-225.
- Efimov VP, Zhang J, Xiang X. 2006. CLIP-170 homologue and NUDE play overlapping roles in NUDF localization in *Aspergillus nidulans*. *Mol Biol Cell*, 17(4): 2021-2034.
- Kumar T, Dweikat I, Sato S, Ge Z, Nersesian N, Chen H, Clemente T. 2012. Modulation of kernel storage proteins in grain sorghum (*Sorghum bicolor* (L.) Moench). *Plant Biotechnol J* 10(5): 533-544.
- Zhao PJ, Yang YL, Du L, Liu JK, Zeng Y. 2013. Elucidating the biosynthetic pathway for vibrallactone: a pancreatic lipase inhibitor with a fused bicyclic b-lactone. *Angew Chem Int Ed* 52: 2298-2302.

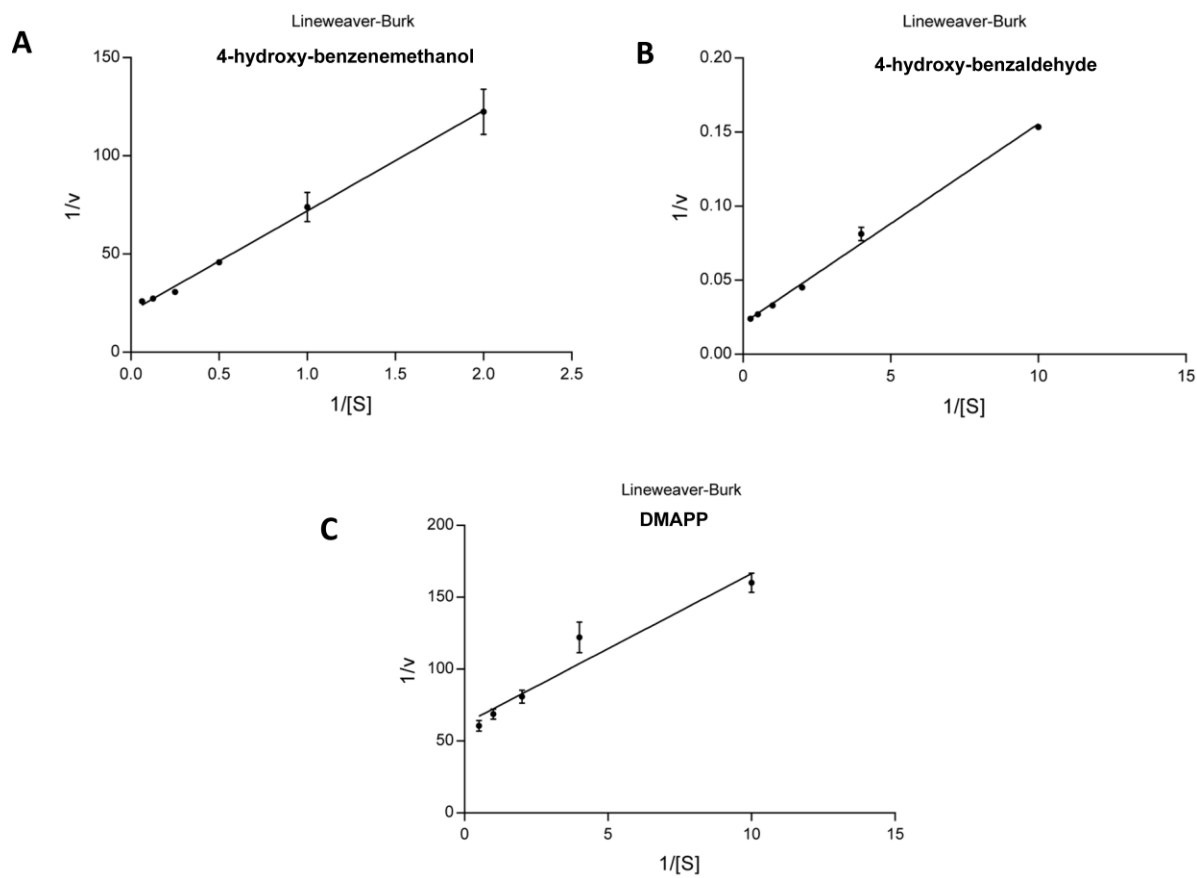

**Figure S1. Michaelis-Menten plots of three substrates. (A)** Lineweaver-Burk of 4-hydroxy-benzenemethanol. **(B)** Lineweaver-Burk of 4-hydroxy-benzaldehyde. **(C)** Lineweaver-Burk of DMAPP.

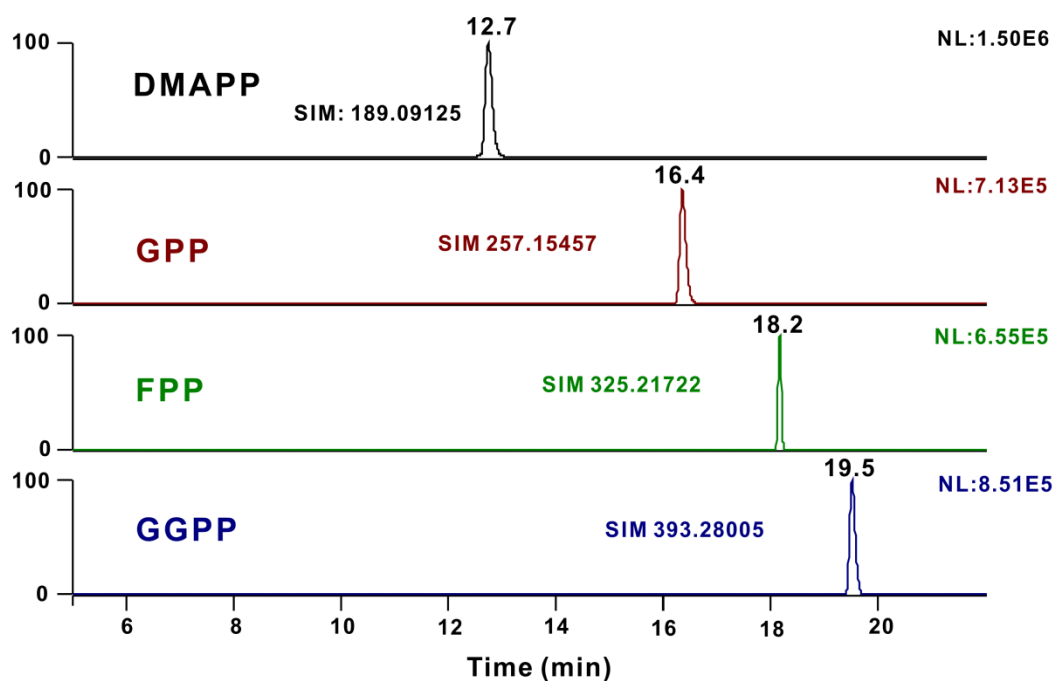

**Figure S2. SIM chromatograms of the products by UPLC-HR-ESI-MS analysis.** The donor specificity of Vib-PT was probed using DMAPP, GPP, FPP or GGPP and 4-hydroxy-benzaldehyde as an acceptor. **DMAPP** shows the specific ion of product for DMAPP and 4-hydroxy-benzaldehyde selected ion monitoring (SIM) peak at  $m/z$  189.09125 [M - H]<sup>-</sup>; **GPP** shows the specific ion of the product for GPP and 4-hydroxy-benzaldehyde SIM peak at  $m/z$   $m/z$  257.15457 [M - H]<sup>-</sup>; **FPP** shows the specific ion of product for FPP and 4-hydroxy-benzaldehyde SIM peak at  $m/z$  325.21722 [M - H]<sup>-</sup>; and **GGPP** shows the specific ion of the product for GGPP and 4-hydroxy-benzaldehyde SIM peak at  $m/z$  393.28005 [M - H]<sup>-</sup>. The retention times of these products were 12.7, 16.4, 18.2 and 19.5 min, consistent with their polarity.

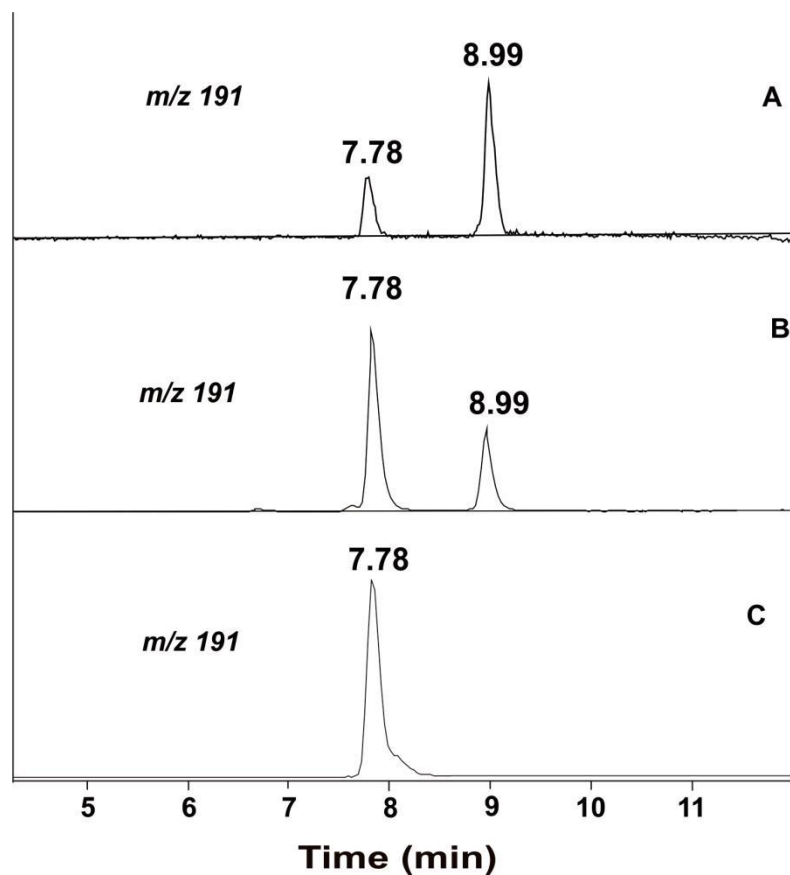

**Figure S3. Chromatogram profiles for the products of 4-hydroxy-benzenemethanol by UPLC-MS analysis. (A)** Extracted ion chromatographs of UPLC-MS analysis of the products for DMAPP and 4-hydroxy-benzenemethanol Vib-PT for 1 h. **(B)** Extracted ion chromatographs of UPLC-MS analysis of the products for DMAPP and 4-hydroxy-benzenemethanol Vib-PT for 20 h. **(C)** 4OPBM was fast converted into 4O3PBM under acidic (such as 0.1% formic acid) and nonenzymatic conditions.
